# Supplementary material for: Repetitive Transcranial Magnetic Stimulation Promotes Neural Stem Cell Proliferation and Differentiation after Intracerebral Hemorrhage in Mice*
Source: PubMed Central journal article supplement (PMC7103604; doi:10.1177/0963689719834870), 2019-03-04
Supplement: Supplemental_Tables.pdf [file Supplemental_Tables.pdf]

Supplementary Table S1

| Rank | GO ID      | GO Name                                    | Diff Gene Counts in GO | Gene Amount in GO | Enrichment Score | p-value  | FDR      |
|------|------------|--------------------------------------------|------------------------|-------------------|------------------|----------|----------|
| 1    | GO:0006355 | regulation of transcription, DNA-dependent | 273                    | 1852              | 3.696985         | 1.46E-79 | 5.41E-76 |
| 2    | GO:0006351 | transcription, DNA-dependent               | 261                    | 1756              | 3.727709         | 9.80E-77 | 1.26E-73 |
| 3    | GO:0007049 | cell cycle                                 | 148                    | 565               | 6.569606         | 1.02E-76 | 1.26E-73 |
| 4    | GO:0006810 | transport                                  | 257                    | 1712              | 3.764917         | 1.89E-76 | 1.75E-73 |
| 5    | GO:0051301 | cell division                              | 91                     | 333               | 6.85367          | 4.47E-49 | 3.32E-46 |
| 6    | GO:0007067 | mitosis                                    | 78                     | 241               | 8.11715          | 3.09E-48 | 1.91E-45 |
| 7    | GO:0006974 | response to DNA damage stimulus            | 84                     | 361               | 5.835769         | 1.58E-39 | 8.40E-37 |
| 8    | GO:0006260 | DNA replication                            | 51                     | 123               | 10.39899         | 3.89E-38 | 1.81E-35 |
| 9    | GO:0007275 | multicellular organismal development       | 131                    | 954               | 3.443888         | 1.09E-34 | 4.50E-32 |
| 10   | GO:0006281 | DNA repair                                 | 70                     | 291               | 6.032969         | 4.29E-34 | 1.59E-31 |
| 11   | GO:0007155 | cell adhesion                              | 91                     | 500               | 4.564544         | 1.02E-33 | 3.43E-31 |
| 12   | GO:0016310 | phosphorylation                            | 105                    | 684               | 3.849987         | 4.38E-32 | 1.36E-29 |
| 13   | GO:0006468 | protein phosphorylation                    | 97                     | 611               | 3.98159          | 6.80E-31 | 1.94E-28 |
| 14   | GO:0008152 | metabolic process                          | 124                    | 991               | 3.138153         | 5.53E-29 | 1.47E-26 |
| 15   | GO:0008150 | biological_process                         | 620                    | 10237             | 1.518955         | 1.06E-28 | 2.63E-26 |
| 16   | GO:0007399 | nervous system development                 | 65                     | 307               | 5.310079         | 2.77E-28 | 6.43E-26 |
| 17   | GO:0006397 | mRNA processing                            | 57                     | 278               | 5.142284         | 3.35E-24 | 7.31E-22 |
| 18   | GO:0015031 | protein transport                          | 80                     | 538               | 3.729355         | 9.15E-24 | 1.89E-21 |
| 19   | GO:0043066 | negative regulation of apoptotic process   | 75                     | 480               | 3.918737         | 1.11E-23 | 2.16E-21 |
| 20   | GO:0006811 | ion transport                              | 81                     | 570               | 3.563988         | 9.38E-23 | 1.74E-20 |



**Supplementary Table S2**

| Rank | Pathway ID | Pathway Name               | Outdegree | Indegree | Degree |
|------|------------|----------------------------|-----------|----------|--------|
| 1    | 4010       | MAPK signaling pathway     | 5         | 31       | 36     |
| 2    | 5200       | Pathways in cancer         | 26        | 0        | 26     |
| 3    | 4210       | Apoptosis                  | 2         | 23       | 25     |
| 4    | 4110       | Cell cycle                 | 3         | 21       | 24     |
| 5    | 4115       | p53 signaling pathway      | 2         | 18       | 20     |
| 6    | 4020       | Calcium signaling pathway  | 5         | 11       | 16     |
| 7    | 4310       | Wnt signaling pathway      | 7         | 8        | 15     |
| 8    | 4012       | ErbB signaling pathway     | 8         | 6        | 14     |
| 9    | 4510       | Focal adhesion             | 7         | 7        | 14     |
| 10   | 4350       | TGF-beta signaling pathway | 4         | 8        | 12     |

**Supplementary Table S3**

| Pathway ID | Pathway Name               | Diff Counts | Gene in | Gene Amount in Pathway | Enrichment Score | p-value              | FDR                  | Gene Symbols                                                                                                                                                                                                                           |
|------------|----------------------------|-------------|---------|------------------------|------------------|----------------------|----------------------|----------------------------------------------------------------------------------------------------------------------------------------------------------------------------------------------------------------------------------------|
| 4010       | MAPK signaling pathway     | 35          |         | 259                    | 3.38917751444749 | 6.95332957303585E-10 | 5.63459465401181E-09 | Ppp5c Cacna1b Cacna1e Cacna2d1 Cacna2d3 Tak1 Ppp3ca Cdc25b Hras1 Atf4 Fgf14 Mapkapk2 Mapk10 Atf2 Rasa2 Flnb Mapk8 Pdgfra Chuk Ddit3 Fgf21 Gadd45a Map3k2 Rps6ka3 Braf Stk3 Tgfb2 Mef2c Tgfbr1 Cacnb4 Cacng2 Map4k3 Rasa1 Rps6ka5 Dusp6 |
| 4360       | Axon guidance              | 31          |         | 133                    | 5.84569414897936 | 2.46808249836573E-15 | 8.28570553022782E-14 | Nfatc1 Sema3a Epha6 Unc5d Hras1 Pak7 Nfat5 Rasa1 Epha5 L1cam Ntn1 Unc5c Robo1 Slit2 Dcc Epha4 Ntn4 Epha7 Met Rock2 Epha3 Plxna4 Plxna3 Sema5a Robo2 Ppp3ca Lrrc4c Ntn1 Rock1 Nrp1 Pak3                                                 |
| 4020       | Calcium signaling pathway  | 16          |         | 185                    | 2.1690736092464  | 0.0074160538165082   | 0.0145231053906619   | Pdgfra Itpkb Ppp3ca Plcb4 ErbB4 Cacna1e P2rx3 Plcb1 Slc8a1 Ednra Cacna1b Slc25a5 Pde1a Atp2b1 Ryr3 Plcd4                                                                                                                               |
| 4350       | TGF-beta signaling pathway | 15          |         | 83                     | 4.53251450727315 | 1.84122661303045E-06 | 9.20613306515224E-06 | Thbs1 Inhba Tgfbr1 Rock2 Zfyve16 Id3 Rock1 Rps6kb1 Bmpr2 Bmp4 Bmp2 Tgfb2 Id1 Dcn Acvr2a                                                                                                                                                |



**Supplementary Table S4**

| Probe Set ID | Gene Symbol | Accession Number | Database Source | Mean Signal of Group rTMS | Mean Signal of Group Blank | d Score  | Fold Change | p-value  | q-value  | Gene Feature |
|--------------|-------------|------------------|-----------------|---------------------------|----------------------------|----------|-------------|----------|----------|--------------|
| 10484276     | Neurod1     | NM_010894        | RefSeq          | 5.922978                  | 4.717428                   | 7.560285 | 2.306252    | 0.000263 | 0        | up           |
| 10607156     | Dcx         | NM_001110222     | RefSeq          | 9.798409                  | 8.495217                   | 4.101576 | 2.467743    | 0.002731 | 0        | up           |
| 10495964     | Neurog2     | NM_009718        | RefSeq          | 6.745101                  | 6.085297                   | 6.464297 | 1.579869    | 0.000512 | 0        | up           |
| 10474312     | Pax6        | NM_001244198     | RefSeq          | 7.508712                  | 7.09887                    | 2.988355 | 1.328541    | 0.006178 | 8.80E-05 | up           |
| 10347036     | Map2        | NM_001039934     | RefSeq          | 9.755172                  | 8.989564                   | 3.065041 | 1.700086    | 0.005817 | 8.80E-05 | up           |
| 10395074     | Myt11       | NM_008666        | RefSeq          | 7.953199                  | 7.128191                   | 4.299004 | 1.771545    | 0.00236  | 0        | up           |
